# Supplementary material for: Which Patients Do We Need to Test for BRCA1/2 Mutation? Feasibility of Adjuvant Olaparib Treatment in Early Breast Cancer–Real-World Data from Two Large German Breast Centers
Source: MDPI journal article supplement (doi:10.3390/cancers15153847), 2023-07-28
Supplement: s1 [file s1]

**Table S1.** Characteristics of the total patient cohort.

|                          | <b>n</b>    | <b>Percentage</b> |
|--------------------------|-------------|-------------------|
| <b>Age</b>               | 2384        | 100               |
|                          | 59.0 ± 12.8 |                   |
| <b>Menopausal status</b> |             |                   |
| Premenopausal            | 750         | 31.5              |
| Postmenopausal           | 1575        | 66.1              |
| Male                     | 3           | 0.1               |
| n/a                      | 56          | 2.3               |
| <b>Histology</b>         |             |                   |
| NST                      | 1951        | 81.8              |
| ILC                      | 301         | 12.6              |
| Other                    | 127         | 5.4               |
| n/a                      | 5           | 0.2               |
| <b>Grading</b>           |             |                   |
| 1                        | 214         | 9.0               |
| 2                        | 1470        | 61.7              |
| 3                        | 694         | 29.1              |
| n/a                      | 6           | 0.2               |
| <b>T-stage *</b>         | 0           |                   |
| 0                        | 272         | 11.4              |
| 1                        | 1315        | 55.2              |
| 2                        | 657         | 27.6              |
| 3                        | 97          | 4.0               |
| 4                        | 43          | 1.8               |
| <b>N-stage *</b>         |             |                   |
| 0                        | 1712        | 71.8              |
| 1                        | 513         | 21.5              |
| 2                        | 112         | 4.7               |
| 3                        | 46          | 1.9               |
| X                        | 1           | 0.1               |
| <b>ER status</b>         |             |                   |
| +                        | 1971        | 82.7              |
| −                        | 413         | 17.3              |
| <b>PR status</b>         |             |                   |
| +                        | 1614        | 67.7              |
| −                        | 770         | 32.3              |
| <b>HER2 status</b>       |             |                   |
| Positive                 | 345         | 14.4              |
| Low                      | 1234        | 51.8              |
| 0                        | <b>805</b>  | 33.8              |
| <b>Ki67</b>              |             |                   |
| ≥20 %                    | 1126        | 47.2              |
| <20 %                    | 1258        | 52.8              |
| <b>Chemotherapy</b>      |             |                   |
| Neoadjuvant              | 505         | 21.2              |
| Adjuvant                 | 507         | 21.3              |
| None                     | 1372        | 57.5              |

\* T and N stages were assessed after surgery. NST, non-special type; ILC, invasive lobular carcinoma; ER, estrogen receptor; PR, progesterone receptor; HER2, human epidermal growth factor receptor 2; TNBC, triple-negative breast cancer; n/a, not available. Headlines are written in bold.

**Table S2.** Indication for genetic testing in the BRCA1/2 genes and potentially other risk genes:

| <b>Families with a minimum of: (Regarding one side of the family)</b> |                                                                                                  |
|-----------------------------------------------------------------------|--------------------------------------------------------------------------------------------------|
| -                                                                     | Three women affected by breast cancer, regardless of age.                                        |
| -                                                                     | Two women affected by breast cancer, with one diagnosis occurring before the age of 51.          |
| -                                                                     | One woman affected by breast cancer and one woman affected by ovarian cancer                     |
| -                                                                     | One woman affected by both breast and ovarian cancer                                             |
| -                                                                     | Two women affected by ovarian cancer                                                             |
| -                                                                     | One woman affected by bilateral breast cancer, with one diagnosis occurring before the age of 51 |
| -                                                                     | One woman affected by breast cancer before the age of 36                                         |
| -                                                                     | One man affected by breast cancer                                                                |
| <b>Further criteria:</b>                                              |                                                                                                  |
| -                                                                     | Personal history of triple-negative breast cancer diagnosed before the age of 60                 |
| -                                                                     | Personal history of ovarian cancer diagnosed before the age of 80                                |

Translated from German to English, comparable to the German version found at [11].
